# Supplementary material
Source: PubMed Central journal article supplement (PMC8499548)
Supplement: 13063_2021_5618_MOESM2_ESM.pdf [file 13063_2021_5618_MOESM2_ESM.pdf]

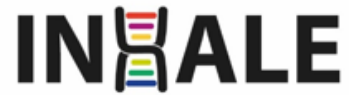

## **INHALE WP3: Antibiotic Prescribing Guidance for use with FilmArray Result**

### **CONSIDERATIONS**

- 1. Adjust dosages for renal function as per Manufacturer's SPC**
- 2. For patients already on antimicrobial treatment for infections necessitating specific regimens e.g. infective endocarditis/ meningitis - please discuss with Microbiology how best to adapt their treatment for organism(s) found by FilmArray.**
- 3. Pregnant and paediatric patients: Please note general recommendations regarding use of fluoroquinolones, tetracyclines, colistin, temocillin and ceftazidime-avibactam. See <https://www.medicines.org.uk/emc/> for specifics.**
- 4. Please be aware that Biofire FilmArray does not detect *Stenotrophomonas maltophilia*. If *S. maltophilia* infection is suspected please adjust therapy accordingly in at risk populations.**

## Key

No known allergy to antibiotics

Mild allergy to  $\beta$ -lactams i.e. rash

Severe allergy to  $\beta$ -lactams, i.e. anaphylaxis

Not applicable

**Table 1. To be used when ONE Organism is Detected by FilmArray**

| <b>First</b><br><i>What organism was found &amp; it the patient allergic to <math>\beta</math>-lactams</i> |                    | <b>Second</b><br><i>If NO resistance genes found, this is the advised R<sub>x</sub></i>                                               | <b>Third</b><br><i>If resistance genes found, this is your advised R<sub>x</sub></i> |               |                 |                            |
|------------------------------------------------------------------------------------------------------------|--------------------|---------------------------------------------------------------------------------------------------------------------------------------|--------------------------------------------------------------------------------------|---------------|-----------------|----------------------------|
|                                                                                                            |                    |                                                                                                                                       | <b>Resistance Marker</b>                                                             |               |                 |                            |
|                                                                                                            |                    | None                                                                                                                                  | CTX-M                                                                                | KPC or OXA-48 | IMP, NDM or VIM | <i>mecA</i> or <i>mecC</i> |
|                                                                                                            | No organisms found | Antibiotics should be stopped unless there is clear evidence for probable or proven bacterial infection severe enough to warrant them |                                                                                      |               |                 |                            |
|                                                                                                            | Any virus          | Co-amoxiclav +antiviral if appropriate                                                                                                |                                                                                      |               |                 |                            |
|                                                                                                            |                    | Cefuroxime +antiviral if appropriate                                                                                                  |                                                                                      |               |                 |                            |
|                                                                                                            |                    | Levofloxacin + antiviral if appropriate                                                                                               |                                                                                      |               |                 |                            |

| <b>First</b><br><i>What organism was found &amp; it the patient allergic to <math>\beta</math>-lactams</i> |                                                                       | <b>Second</b><br><i>If NO resistance genes found, this is the advised R<sub>x</sub></i>           | <b>Third</b><br><i>If resistance genes found, this is your advised R<sub>x</sub></i> |                                                                         |                                                                         |                            |
|------------------------------------------------------------------------------------------------------------|-----------------------------------------------------------------------|---------------------------------------------------------------------------------------------------|--------------------------------------------------------------------------------------|-------------------------------------------------------------------------|-------------------------------------------------------------------------|----------------------------|
|                                                                                                            |                                                                       | None                                                                                              | CTX-M                                                                                | KPC or OXA-48                                                           | IMP, NDM or VIM                                                         | <i>mecA</i> or <i>mecC</i> |
|                                                                                                            | Any virus + 1 or more bacteria                                        | Treat as indicated for bacterial infection and add antiviral treatment where appropriate          |                                                                                      |                                                                         |                                                                         |                            |
| Organism                                                                                                   | <i>A. baumannii</i>                                                   | Meropenem <sup>1</sup>                                                                            |                                                                                      |                                                                         |                                                                         |                            |
|                                                                                                            |                                                                       | Meropenem <sup>1</sup>                                                                            |                                                                                      |                                                                         |                                                                         |                            |
|                                                                                                            |                                                                       | Colistin alone or in combination <sup>2</sup> if clinically appropriate                           |                                                                                      |                                                                         |                                                                         |                            |
|                                                                                                            | <i>E. aerogenes, E. cloacae, E. coli, K. pneumoniae or K. oxytoca</i> | Temocillin (2g TDS)                                                                               | Temocillin (2g TDS)                                                                  | Ceftazidime-avibactam <sup>3</sup>                                      | Colistin alone or in combination <sup>2</sup> if clinically appropriate |                            |
|                                                                                                            |                                                                       | Ceftriaxone ( <i>Klebsiella</i> spp. & <i>E. coli</i> ) OR Meropenem for <i>Enterobacter</i> spp. | Meropenem                                                                            | Ceftazidime-avibactam <sup>3</sup>                                      | Colistin alone or in combination <sup>2</sup> if clinically appropriate |                            |
|                                                                                                            |                                                                       | Levofloxacin or Ciprofloxacin                                                                     | Colistin alone or in combination <sup>2</sup> if clinically appropriate              | Colistin alone or in combination <sup>2</sup> if clinically appropriate | Colistin alone or in combination <sup>2</sup> if clinically appropriate |                            |
|                                                                                                            | <i>Proteus</i> spp. or <i>S. marcescens</i>                           | Piperacillin-tazobactam for <i>Serratia</i> sp. OR Temocillin 2g TDS for <i>Proteus</i> sp.       | Temocillin 2g TDS for <i>Proteus</i> sp. OR Meropenem for <i>Serratia</i> sp.        | Ceftazidime-avibactam <sup>3</sup>                                      | Fosfomycin <sup>4</sup>                                                 |                            |
|                                                                                                            |                                                                       | Ceftriaxone                                                                                       | Meropenem                                                                            | Ceftazidime-avibactam <sup>3</sup>                                      | Fosfomycin <sup>4</sup>                                                 |                            |
|                                                                                                            |                                                                       | Fosfomycin <sup>4</sup>                                                                           | Fosfomycin <sup>4</sup>                                                              | Fosfomycin <sup>4</sup>                                                 | Fosfomycin <sup>4</sup>                                                 |                            |
|                                                                                                            | <i>H. influenzae</i>                                                  | Co-amoxiclav                                                                                      |                                                                                      |                                                                         |                                                                         |                            |
|                                                                                                            |                                                                       | Cefuroxime                                                                                        |                                                                                      |                                                                         |                                                                         |                            |
|                                                                                                            |                                                                       | Doxycycline OR Levofloxacin or Ciprofloxacin                                                      |                                                                                      |                                                                         |                                                                         |                            |

|  |                                                           |                                                                         |                                                                         |                                                                         |                                                                         |                                        |
|--|-----------------------------------------------------------|-------------------------------------------------------------------------|-------------------------------------------------------------------------|-------------------------------------------------------------------------|-------------------------------------------------------------------------|----------------------------------------|
|  | <i>M. catarrhalis</i>                                     | Co-amoxiclav                                                            |                                                                         |                                                                         |                                                                         |                                        |
|  |                                                           | Cefuroxime                                                              |                                                                         |                                                                         |                                                                         |                                        |
|  |                                                           | Doxycycline OR Levofloxacin or Ciprofloxacin                            |                                                                         |                                                                         |                                                                         |                                        |
|  | <i>P. aeruginosa</i>                                      | Ceftazidime (2g TDS)                                                    | Meropenem                                                               | Ceftazidime-avibactam <sup>3</sup>                                      | Colistin alone or in combination <sup>2</sup> if clinically appropriate |                                        |
|  |                                                           | Ceftazidime (2g TDS)                                                    | Meropenem                                                               | Ceftazidime-avibactam <sup>3</sup>                                      | Colistin alone or in combination <sup>2</sup> if clinically appropriate |                                        |
|  |                                                           | Colistin alone or in combination <sup>2</sup> if clinically appropriate | Colistin alone or in combination <sup>2</sup> if clinically appropriate | Colistin alone or in combination <sup>2</sup> if clinically appropriate | Colistin alone or in combination <sup>2</sup> if clinically appropriate |                                        |
|  | <i>S. aureus</i>                                          | Flucloxacillin <sup>5</sup>                                             |                                                                         |                                                                         |                                                                         | Glycopeptide <sup>6</sup> or Linezolid |
|  |                                                           | Cefuroxime                                                              |                                                                         |                                                                         |                                                                         | Glycopeptide <sup>6</sup> or Linezolid |
|  |                                                           | Glycopeptide <sup>6</sup> or Linezolid                                  |                                                                         |                                                                         |                                                                         | Glycopeptide <sup>6</sup> or Linezolid |
|  | <i>S. agalactiae, S. pneumoniae</i> or <i>S. pyogenes</i> | Amoxicillin                                                             |                                                                         |                                                                         |                                                                         |                                        |
|  |                                                           | Cefuroxime                                                              |                                                                         |                                                                         |                                                                         |                                        |
|  |                                                           | Glycopeptide <sup>6</sup> or Linezolid                                  |                                                                         |                                                                         |                                                                         |                                        |
|  | <i>C. pneumoniae, L. pneumophila, M. pneumoniae</i>       | Macrolide <sup>7</sup> OR Levofloxacin or Ciprofloxacin                 |                                                                         |                                                                         |                                                                         |                                        |
|  |                                                           | Macrolide <sup>7</sup> OR Levofloxacin or Ciprofloxacin                 |                                                                         |                                                                         |                                                                         |                                        |
|  |                                                           | Macrolide <sup>7</sup> OR Levofloxacin or Ciprofloxacin                 |                                                                         |                                                                         |                                                                         |                                        |

Footnotes

1. In units with high rates of carbapenem resistance, or if experiencing outbreak of carbapenem-resistant *A. baumannii* follow same recommendations as for treatment in case of allergy
2. Colistin can be combined with an appropriate second antimicrobial such as rifampicin or tigecycline. The choice is left open according to local preference.
3. Please discuss with microbiologist before prescribing
4. Consider adding colistin as metallo  $\beta$ -lactamase likely to be present in undetected host organism
5. If clinical picture suggests PVL-positive *S. aureus* consider ordering PVL test and switching to linezolid
6. Vancomycin or teicoplanin
7. Clarithromycin or azithromycin

## Key

No known allergy to antibiotics

Mild allergy to  $\beta$ -lactams i.e. rash

Severe allergy to  $\beta$ -lactams, i.e. anaphylaxis

Not applicable

**Table 2. Recommended treatment for combination of TWO or more organisms are detected by FilmArray**

PLEASE READ THIS TABLE FROM LEFT TO RIGHT; Coloured boxes refer to allergy status as in Table 1.

Key: + organism present, - organism absent,  $\pm$  either present or absent

| First, What combination of bacteria have been found?                                                   |                                                                                                                            |                                                      |                                                      |                                                   |                                                   | Second:<br>Therapy<br>if no<br>resistance<br>genes | Third: if resistance genes found                  |                                      |                                                                    |                                   |
|--------------------------------------------------------------------------------------------------------|----------------------------------------------------------------------------------------------------------------------------|------------------------------------------------------|------------------------------------------------------|---------------------------------------------------|---------------------------------------------------|----------------------------------------------------|---------------------------------------------------|--------------------------------------|--------------------------------------------------------------------|-----------------------------------|
| A.<br>baumannii                                                                                        | Enterobacteriales:<br>E. aerogenes, E.<br>cloacae, E. coli, K.<br>pneumoniae, K.<br>oxytoca, Proteus<br>sp., S. marcescens | P. aeruginosa                                        | H.<br>influenzae/M.<br>catarrhalis                   | S. aureus                                         | S. agalactiae,<br>S. pneumoniae<br>or S. pyogenes |                                                    | mecA/C found                                      | CTX-M<br>found                       | C. pneumoniae,<br>L. pneumophila<br>OR M.<br>pneumoniae            | Carbapen-<br>emase<br>found       |
| Does the mixture include <i>Acinetobacter</i> ? If YES ; stay with this block; if NO, go to next block |                                                                                                                            |                                                      |                                                      |                                                   |                                                   |                                                    |                                                   |                                      |                                                                    |                                   |
| +                                                                                                      | Any one or more second organism found                                                                                      |                                                      |                                                      |                                                   |                                                   | Meropenem <sup>8</sup>                             | Add<br>Glycopeptide <sup>10</sup><br>OR Linezolid | -                                    | Add Macrolide <sup>11</sup><br>OR Levofloxacin<br>or Ciprofloxacin | Discuss<br>with Micro-<br>biology |
| +                                                                                                      | $\pm$<br>Any one or more second organism found                                                                             |                                                      |                                                      |                                                   |                                                   | Meropenem <sup>8</sup>                             | Add<br>Glycopeptide <sup>10</sup><br>OR Linezolid | -                                    | Add Macrolide <sup>11</sup><br>OR Levofloxacin<br>or Ciprofloxacin | Discuss<br>with Micro-<br>biology |
| +                                                                                                      | Add Levofloxacin<br>or Ciprofloxacin <sup>9</sup>                                                                          | Add<br>Levofloxacin or<br>Ciprofloxacin <sup>9</sup> | Add<br>Levofloxacin or<br>Ciprofloxacin <sup>9</sup> | Add<br>Glycopeptide <sup>10</sup><br>OR Linezolid | Add<br>Glycopeptide <sup>10</sup><br>OR Linezolid | Colistin<br>Combination                            | Add<br>Glycopeptide <sup>10</sup><br>OR Linezolid | Discuss<br>with<br>Micro-<br>biology | Add Macrolide <sup>11</sup><br>OR Levofloxacin<br>or Ciprofloxacin | Discuss<br>with Micro-<br>biology |

| First, What combination of bacteria have been found?                                             |                                                                                                                                                |                                                |                                                |                                             | Second:                                                           | Third: if resistance genes found            |                                             |                                                              |                                                                      |                           |
|--------------------------------------------------------------------------------------------------|------------------------------------------------------------------------------------------------------------------------------------------------|------------------------------------------------|------------------------------------------------|---------------------------------------------|-------------------------------------------------------------------|---------------------------------------------|---------------------------------------------|--------------------------------------------------------------|----------------------------------------------------------------------|---------------------------|
| A. baumannii                                                                                     | <i>E. aerogenes</i> , <i>E. cloacae</i> , <i>E. coli</i> , <i>K. pneumoniae</i> , <i>K. oxytoca</i> , <i>Proteus</i> sp., <i>S. marcescens</i> | <i>P. aeruginosa</i>                           | <i>H. influenzae</i> / <i>M. catarrhalis</i>   | <i>S. aureus</i>                            | <i>S. agalactiae</i> , <i>S. pneumoniae</i> or <i>S. pyogenes</i> | Therapy if no resistance genes              | <i>mecA/C</i> found                         | CTX-M found                                                  | <i>C. pneumoniae</i> , <i>L. pneumophila</i> OR <i>M. pneumoniae</i> | Carbapenemase found       |
| If NO <i>Acinetobacter</i> : but $\geq 1$ <i>Pseudomonas</i> /Enterobacteriales found start here |                                                                                                                                                |                                                |                                                |                                             |                                                                   |                                             |                                             |                                                              |                                                                      |                           |
| -                                                                                                | + (at least one)                                                                                                                               |                                                | ±                                              | ±                                           | ±                                                                 | Piperacillin/Tazobactam                     | Add Glycopeptide <sup>10</sup> OR Linezolid | Escalate to Meropenem                                        | Add Macrolide <sup>11</sup> OR Levofloxacin or Ciprofloxacin         | Discuss with Microbiology |
| -                                                                                                | + (at least one)                                                                                                                               |                                                | ±                                              | ±                                           | ±                                                                 | Meropenem                                   | Add Glycopeptide <sup>10</sup> OR Linezolid | -                                                            | Add Macrolide <sup>11</sup> OR Levofloxacin or Ciprofloxacin         | Discuss with Microbiology |
| -                                                                                                | Add Levofloxacin or Ciprofloxacin <sup>9</sup>                                                                                                 | Add Levofloxacin or Ciprofloxacin <sup>9</sup> | Add Levofloxacin or Ciprofloxacin <sup>9</sup> | Add Glycopeptide <sup>10</sup> OR Linezolid | Add Glycopeptide <sup>10</sup> OR Linezolid                       | Colistin Combination as indicated           | Add Glycopeptide <sup>10</sup> OR Linezolid | Discuss with Microbiology                                    | Add Macrolide <sup>11</sup> OR Levofloxacin or Ciprofloxacin         | Discuss with Microbiology |
| If NO <i>Acinetobacter</i> NO <i>Pseudomonas</i> & NO Enterobacteriaceae start here              |                                                                                                                                                |                                                |                                                |                                             |                                                                   |                                             |                                             |                                                              |                                                                      |                           |
| None of these                                                                                    |                                                                                                                                                | Any 2 or more of these                         |                                                |                                             | Co-amoxiclav                                                      | Add Glycopeptide <sup>10</sup> OR Linezolid |                                             | Add Macrolide <sup>11</sup> OR Levofloxacin or Ciprofloxacin |                                                                      |                           |
| None of these                                                                                    |                                                                                                                                                | Any 2 or more of these                         |                                                |                                             | Levofloxacin                                                      | Add Glycopeptide <sup>10</sup> OR Linezolid |                                             | Add Macrolide <sup>11</sup> OR Levofloxacin or Ciprofloxacin |                                                                      |                           |
| None of these                                                                                    |                                                                                                                                                | Any 2 or more of these                         |                                                |                                             | Levofloxacin                                                      | Add Glycopeptide <sup>10</sup> OR Linezolid |                                             | Add Macrolide <sup>11</sup> OR Levofloxacin or Ciprofloxacin |                                                                      |                           |

**Footnotes**

8. Add colistin in areas of high carbapenem-resistance among *A. baumannii*.
9. Consider adding tigecycline or fosfomycin if fluoroquinolone resistance locally prevalent
10. Vancomycin or teicoplanin
11. Clarithromycin or azithromycin
